# Supplementary material
Source: MDPI journal article supplement (https://www.mdpi.com/2077-1312/9/9/975)
Supplement: s1 [file s1 › jmse-1344625-supplementary.pdf]

**First-year survival of northern fur seals (*Callorhinus ursinus*) can be explained by pollock (*Gadus chalcogrammus*) catches in the eastern Bering Sea**

Jeffrey W. Short<sup>1\*</sup>, Harold J. Geiger<sup>2</sup>, Lowell W. Fritz<sup>3</sup>, Jonathan J. Warrenchuk<sup>4</sup>

**Supplemental Figures**

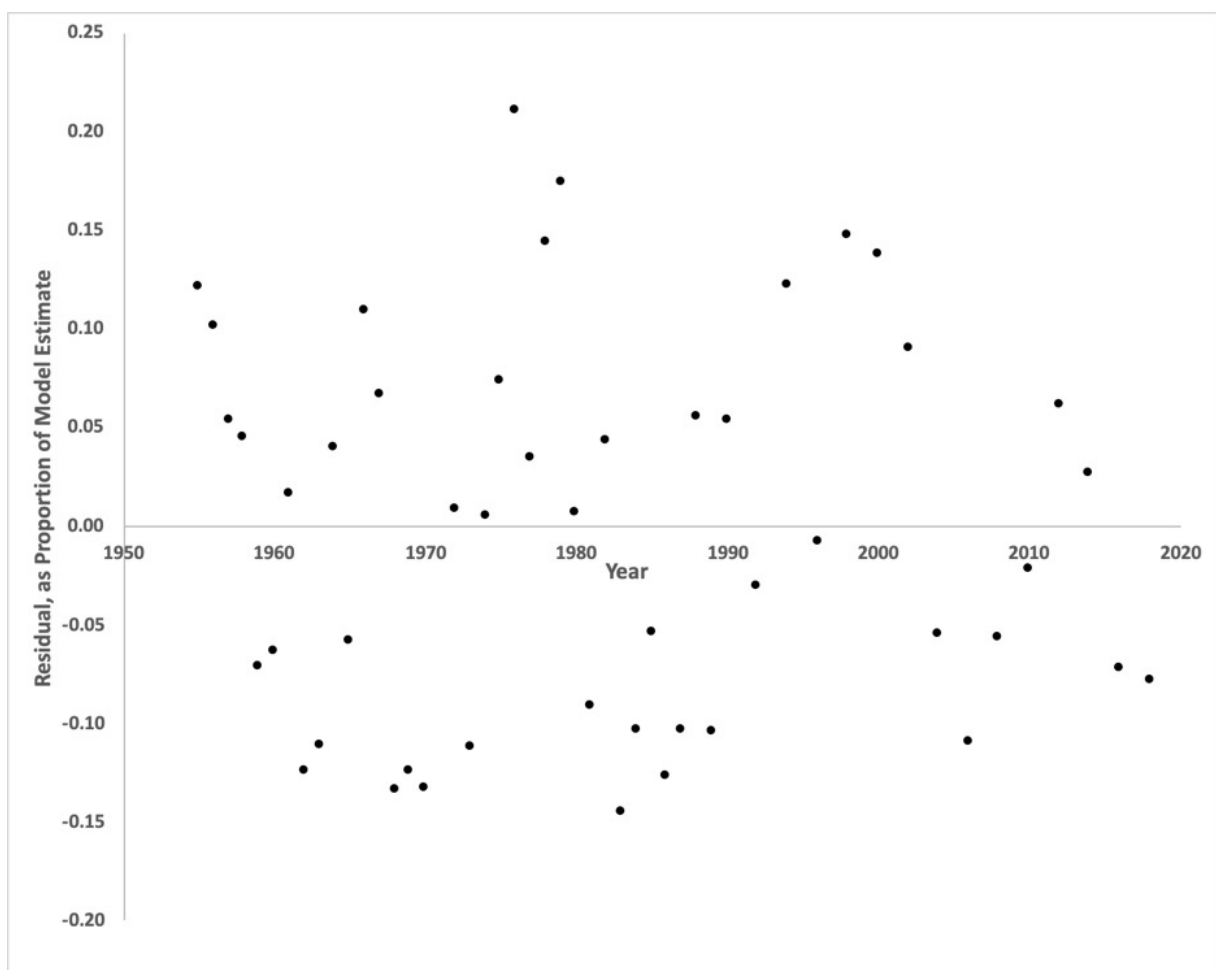

Figure S1. Residuals as proportional differences between observed and modelled values of northern fur seal pup births, based on pollock catches (Model 1). The observed and modelled values are depicted in Figure 2 of the main text.

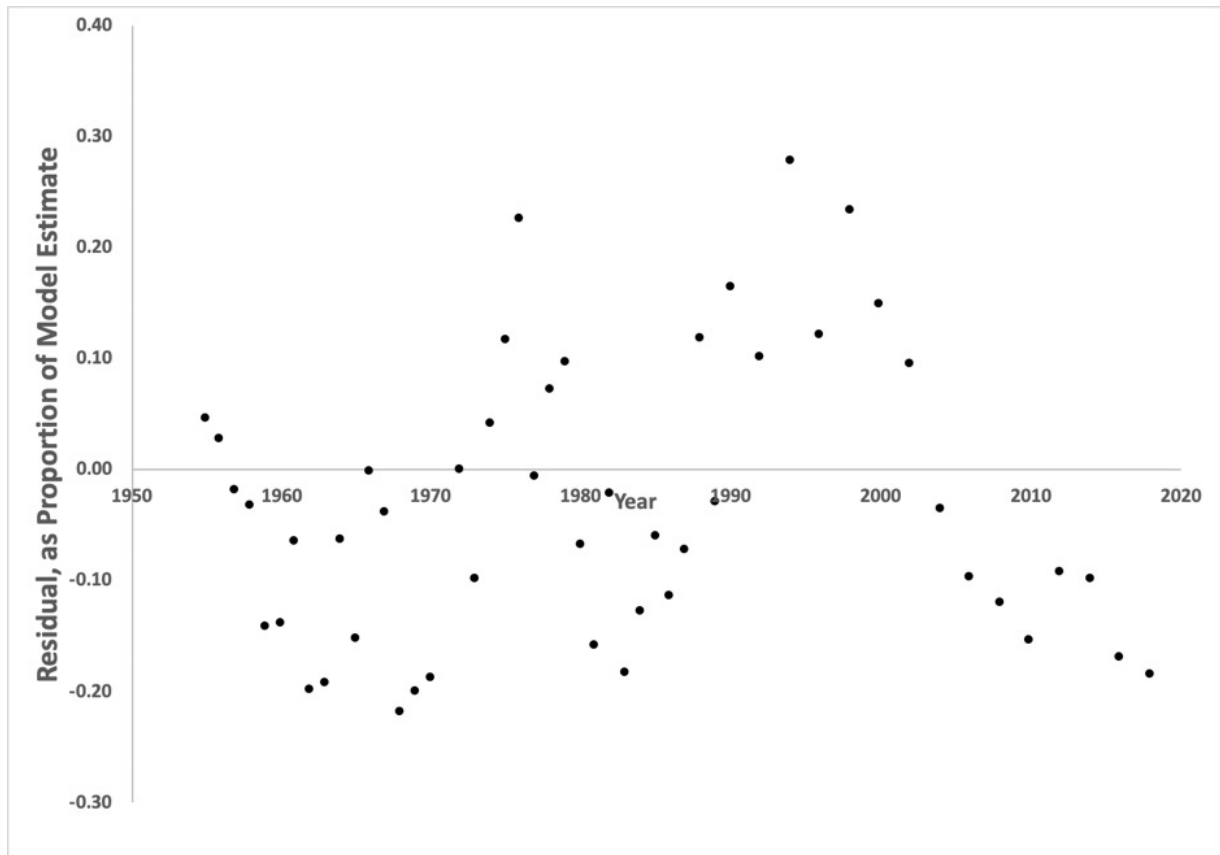

Figure S2. Residuals as proportional differences between observed and modelled values of northern fur seal pup births, based on pollock biomass (Model 2). The observed and modelled values are depicted in Figure 2 of the main text.
